# Supplementary material for: The miR-590-3p/CFHR3/STAT3 signaling pathway promotes cell proliferation and metastasis in hepatocellular carcinoma
Source: publisher site journal article supplement (doi:10.18632/aging.204178), 2022-07-18
Supplement: Supplementary file [file aging-v14i14-204178-supplementary-material-SD2.pdf]

**SUPPLEMENTARY FIGURES**

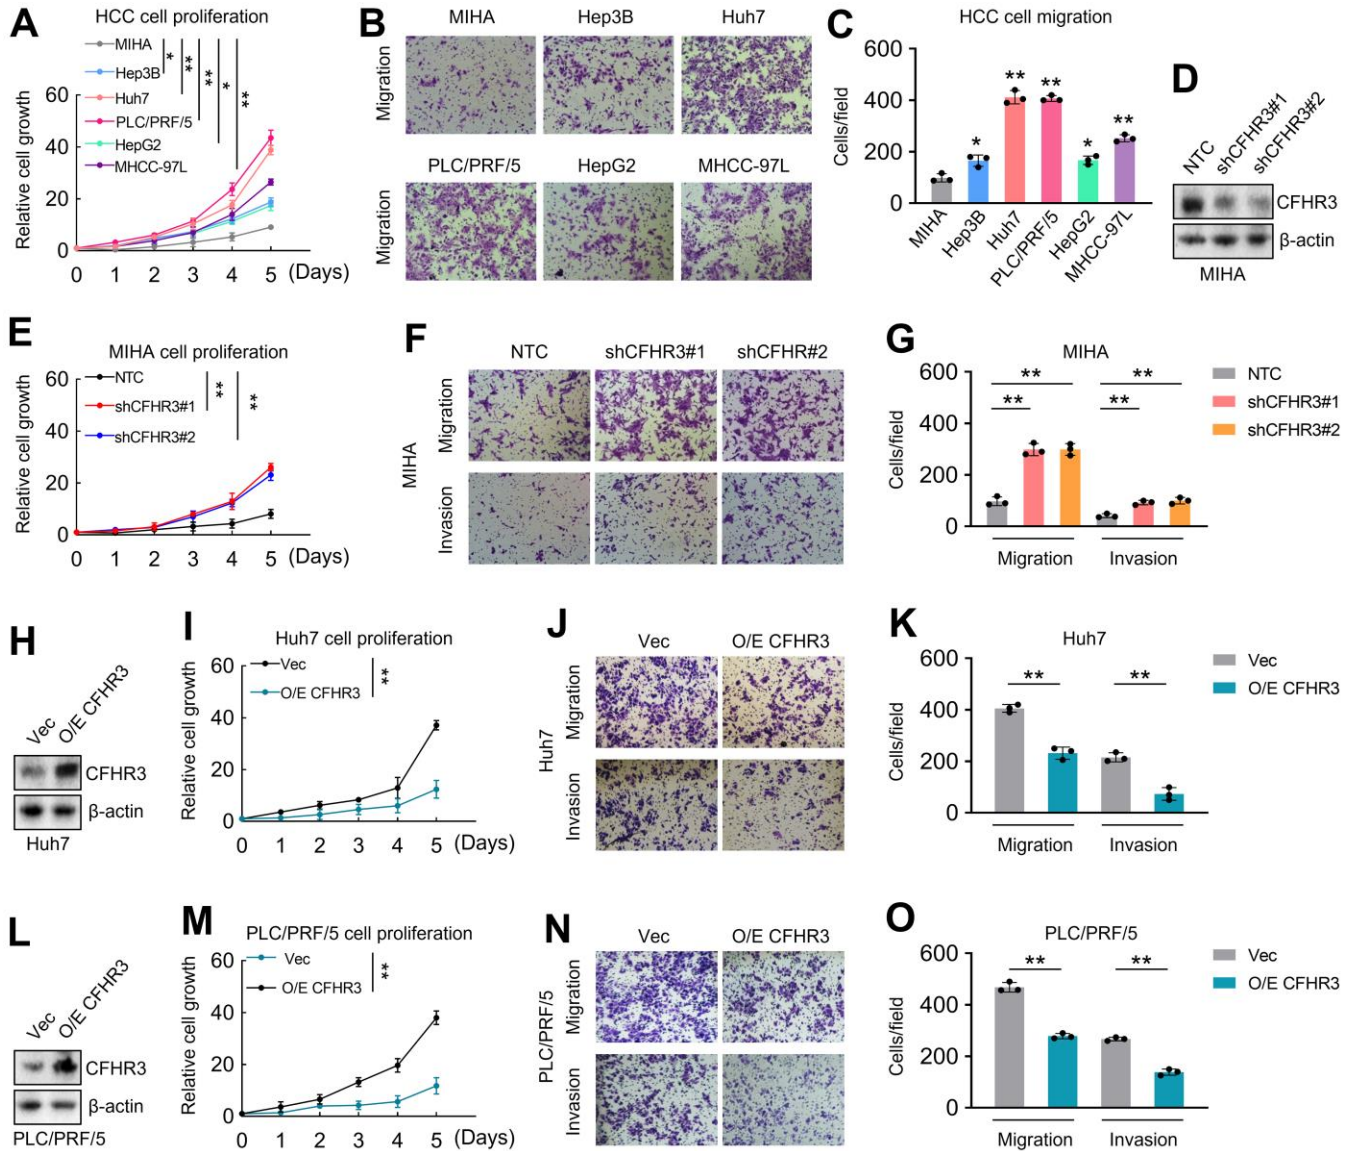

**Supplementary Figure 1. Related to Figure 2.** (A) The cell growth abilities of difference five HCC cell lines and the MIHA cell were determined (N=3). (B, C) The migration abilities of difference five HCC cell lines and the MIHA cell were determined (N=3). (D) CFHR3 knockdown efficiency was validated by western blot in MIHA cells. (E) Cell growth of CFHR3-knockdown MIHA cells and negative control (NTC) cells were determined (N=3). (F, G) Migration and invasion of CFHR3-knockdown MIHA cells and NTC cells were determined (N=3). (H) CFHR3 overexpression was validated by western blot in Huh7 cells. (I, J) Cell growth (I), migration and invasion (J, K) of CFHR3-overexpression Huh7 cells and Vector control (Vec) cells were determined (N=3). (L) CFHR3 overexpression was validated by western blot in PLC/PRF/5 cells. (M–O) Cell growth (M), migration and invasion (N, O) of CFHR3-overexpression PLC/PRF/5 cells and Vec cells were determined (N=3). (Remarks: \* represents  $P < 0.05$ , \*\* represents  $P < 0.01$ ; Data are presented as mean  $\pm$  SD).

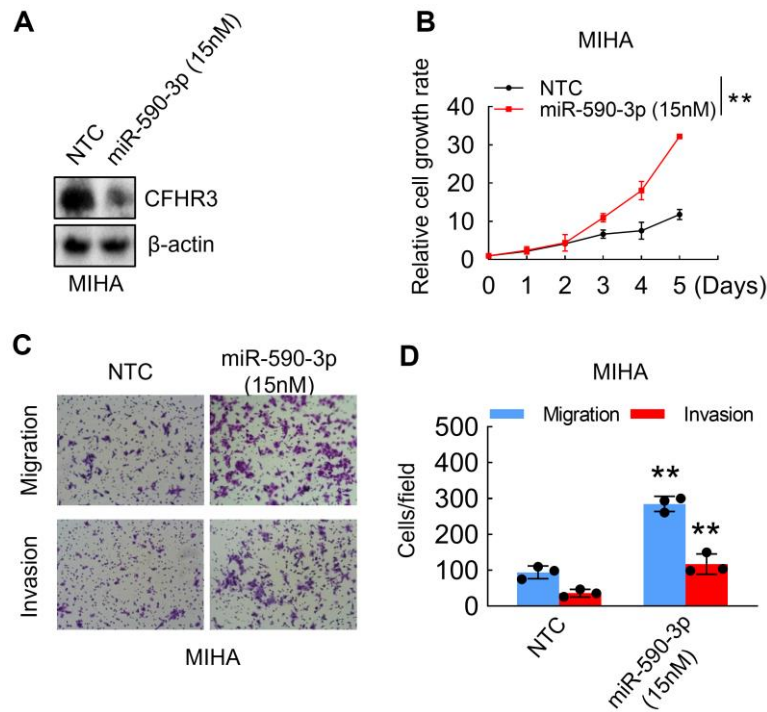

**Supplementary Figure 2. Related to Figure 3.** (A–D) MIHA cells were transfected with 15nM miR-590-3p precursor, and CFHR3 protein levels (A), cell growth (B), migration and invasion (C, D) were determined (N=3). (Remarks: \* represents  $P < 0.05$ ; \*\* represents  $P < 0.01$ ; Data are presented as mean  $\pm$  SD).

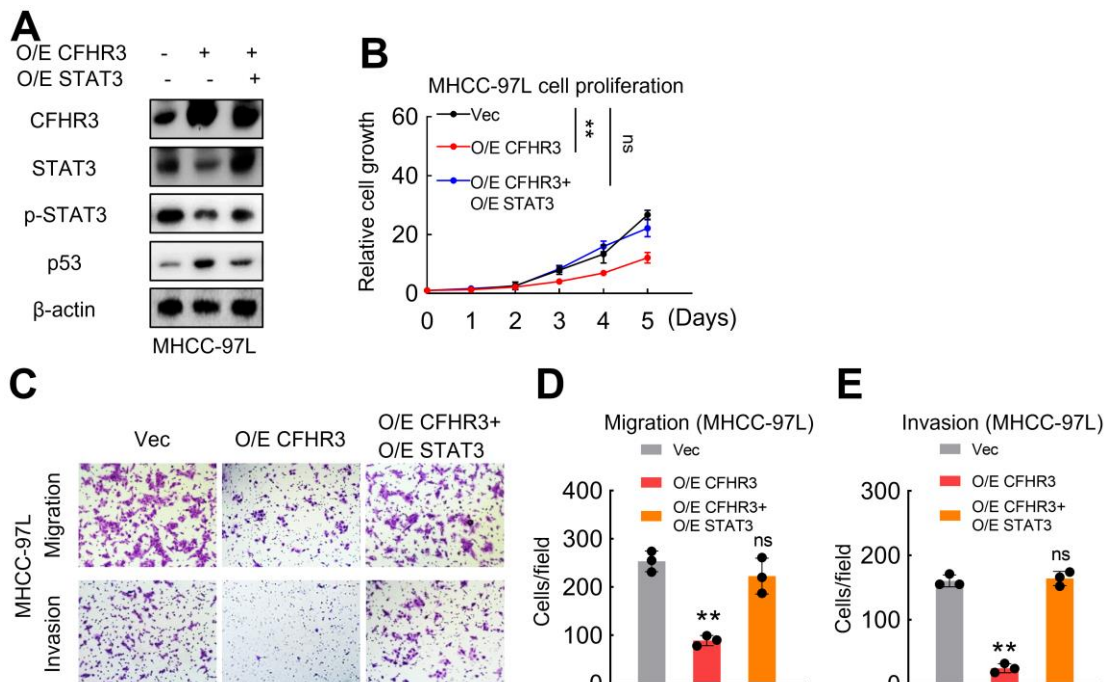

**Supplementary Figure 3. Related to Figure 5.** (A–E) CFHR3-overexpressed MHCC-97L cells were overexpressed with STAT3, and the indicated protein levels (A), cell growth (B), migration and invasion (C–E) were determined (N=3). (Remarks: \* represents  $P < 0.05$ ; \*\* represents  $P < 0.01$ ; Data are presented as mean  $\pm$  SD).
