# Supplementary material for: The miR-590-3p/CFHR3/STAT3 signaling pathway promotes cell proliferation and metastasis in hepatocellular carcinoma
Source: publisher site journal article supplement (doi:10.18632/aging.204178), 2022-07-18
Supplement: Supplementary file [file aging-v14i14-204178-supplementary-material-SD3.pdf]

## SUPPLEMENTARY TABLE

**Supplementary Table 1. Correlations between CFHR3 transcript levels and clinicopathological features in 370 HCC cases of TCGA database.**

| Clinical features  | Groups     | All cases | CFHR3 |      | X <sup>2</sup> | P-value* |
|--------------------|------------|-----------|-------|------|----------------|----------|
|                    |            |           | Low   | High |                |          |
| Age                | <60 Y      | 168       | 91    | 77   | 2.137          | 0.144    |
|                    | >=60 Y     | 202       | 94    | 108  |                |          |
| Gender             | Female     | 122       | 65    | 57   | 0.783          | 0.376    |
|                    | Male       | 248       | 120   | 128  |                |          |
| AFP                | <400 µg/L  | 213       | 89    | 124  | 7.263          | 0.007    |
|                    | >=400 µg/L | 64        | 39    | 25   |                |          |
| Fibrosis           | No         | 75        | 46    | 29   | 0.944          | 0.331    |
|                    | Yes        | 136       | 74    | 62   |                |          |
| Histological grade | G1-2       | 233       | 105   | 128  | 4.942          | 0.026    |
|                    | G3-4       | 133       | 76    | 57   |                |          |
| Tumor size         | T1-2       | 273       | 122   | 151  | 13.951         | <0.001   |
|                    | T3-4       | 95        | 63    | 32   |                |          |
| Recurrence         | No         | 172       | 76    | 96   | 4.318          | 0.038    |
|                    | Yes        | 143       | 80    | 63   |                |          |
| TNM stage          | I-II       | 255       | 113   | 142  | 12.541         | <0.001   |
|                    | III-IV     | 91        | 61    | 31   |                |          |

\*Pearson Chi-square test.
